# Supplementary material for: Altered Gut Microbiota Composition in Subjects Infected With Clonorchis sinensis
Source: Front Microbiol. 2018 Sep 28;9:2292. doi: 10.3389/fmicb.2018.02292 (PMC6172334; doi:10.3389/fmicb.2018.02292)
Supplement: TABLE S1 — Clinical/demographic parameters of the 160 participants. [file Table_1.XLSX]

## Sheet: Sheet1
Table S1 Clinical/demographic parameters of the 160 participants.
Sample ID	Gender	Age	EPG	Group
TP054	male	54	0	EN1
XZ030	male	30	0	EN1
XZ008	male	33	0	EN1
MJ034	male	36	0	EN1
XZ038	male	29	0	EN1
XZ064	male	45	0	EN1
XZ088	male	28	0	EN1
XZ101	male	33	0	EN1
MJ074	male	51	0	EN1
MJ076	male	47	0	EN1
MJ084	male	37	0	EN1
MJ093	male	45	0	EN1
TP010	male	48	0	EN1
TP019	male	28	0	EN1
TP069	male	42	0	EN1
TP089	male	32	0	EN1
XQ152	male	54	0	EN1
XZ113	male	38	0	EN1
XZ003	male	40	0	EN1
MJ082	female	13	0	EN1
XZ012	female	55	0	EN1
MJ017	female	35	0	EN1
MJ031	female	28	0	EN1
XZ029	female	35	0	EN1
XZ058	female	33	0	EN1
XZ060	female	45	0	EN1
XZ071	female	40	0	EN1
MJ043	female	50	0	EN1
MJ055	female	52	0	EN1
MJ103	female	50	0	EN1
TP020	female	28	0	EN1
TP090	female	29	0	EN1
XQ153	female	35	0	EN1
XZ005	female	45	0	EN1
XZ043	male	42	24	EP1
JJ081	male	39	72	EP1
MJ077	male	50	72	EP1
TP051	male	42	72	EP1
TP055	male	45	2184	EP1
TP042	male	50	1584	EP1
JJ156	male	53	1368	EP1
XZ056	male	28	240	EP1
JJ064	male	42	96	EP1
JJ070	male	46	48	EP1
TP053	male	22	7752	EP1
TP035	male	40	3288	EP1
TP074	male	40	2784	EP1
JJ056	male	43	2736	EP1
JJ157	male	57	2448	EP1
TP070	male	47	2376	EP1
JJ181	male	47	2352	EP1
JJ007	male	51	1968	EP1
JJ146	male	35	1104	EP1
XQ137	male	54	768	EP1
TP052	male	32	696	EP1
XQ143	male	39	504	EP1
JJ042	male	30	456	EP1
TP075	male	45	432	EP1
JJ033	male	38	168	EP1
XZ140	male	36	48	EP1
TP086	male	40	768	EP1
JJ008	male	38	408	EP1
TP041	female	52	168	EP1
JJ153	female	36	24	EP1
XZ047	female	39	120	EP1
TP036	female	38	1512	EP1
TP087	female	40	1440	EP1
TP123	female	36	648	EP1
TP079	female	34	456	EP1
JJ178	female	56	360	EP1
JJ147	female	54	336	EP1
JJ074	female	38	72	EP1
MJ073	male	65	0	EN2
XQ144	male	87	0	EN2
XQ162	male	65	0	EN2
MJ027	female	86	0	EN2
XZ095	female	60	0	EN2
MJ039	female	60	0	EN2
MJ099	female	64	0	EN2
MJ107	female	65	0	EN2
JJ061	male	65	1800	EP2
JJ062	male	74	1656	EP2
JJ171	male	73	192	EP2
TP034	male	60	5736	EP2
JJ003	male	70	456	EP2
JJ105	female	82	168	EP2
JJ151	female	72	96	EP2
JJ162	female	83	96	EP2
JJ060	female	75	1464	EP2
